# Supplementary material for: Underestimation of Species Richness in Neotropical Frogs Revealed by mtDNA Analyses
Source: PubMed Central journal article supplement (PMC2040503; doi:10.1371/journal.pone.0001109), 2007-10-31
Supplement: pone.0001109.s002.pdf [file pone.0001109.s002.pdf]

| Species/lineage                 | voucher number       | Accession number 16S |   | Countries     | Locality                                                                                      | References                 | Coordinates           |
|---------------------------------|----------------------|----------------------|---|---------------|-----------------------------------------------------------------------------------------------|----------------------------|-----------------------|
| <i>Adenomera andreae A</i>      | 32mc                 | EU201044             | X | French Guiana | Montjoly                                                                                      | New                        | 04 55 00 N 52 16 00 W |
| <i>Adenomera andreae B</i>      | 216mc                | EU201046             | X | French Guiana | Saül                                                                                          | New                        | 03 37 32 N 53 12 26 W |
| <i>Adenomera andreae B</i>      | 105AF                | EU201047             | X | Suriname      | Road to Apura                                                                                 | New                        | 05 11 00 N 55 39 00 W |
| <i>Adenomera andreae C</i>      | 87bm                 | EU201048             | X | French Guiana | Mt Arawa                                                                                      | New                        | 02 48 59 N 53 21 59 W |
| <i>Adenomera andreae D</i>      | 199bm                | EU201045             | X | French Guiana | Trinité                                                                                       | New                        | 04 35 00 N 53 21 00 W |
| <i>Adenomera andreae E</i>      | 121AF                | EU201049             | X | Suriname      | Brownsberg                                                                                    | New                        | 04 56 31 N 55 10 33 W |
| <i>Adenomera heyeri A</i>       | 221mc                | EU201050             | X | French Guiana | Montagne des singes                                                                           | New                        | 05 04 00 N 52 43 00 W |
| <i>Adenomera heyeri B</i>       | 46PG                 | EU201051             | X | French Guiana | Piton baron                                                                                   | New                        | 03 17 00 N 53 04 00 W |
| <i>Adenomera hylaedactyla A</i> | 272mc                | EU201054             | X | French Guiana | Kaw                                                                                           | New                        | 04 42 00 N 52 18 00 W |
| <i>Adenomera hylaedactyla B</i> | 92mc                 | EU201052             | X | French Guiana | Montagne d'argent                                                                             | New                        | 04 23 00 N 51 42 00 W |
| <i>Adenomera hylaedactyla C</i> | 1235BPN              | EU201053             | X | Guyana        | Imbaimadai                                                                                    | New                        | 05 44 23 N 60 17 51 W |
| <i>Adenomera hylaedactyla D</i> | MJH 3669             | DQ283063             | X | Peru          | Huanuco, Rio Llullapichis, Panguana                                                           | Frost et al., 2006         | 09 23 02 S 75 52 57 W |
| <i>Adenomera hylaedactyla E</i> | MZUSP 70958          | AY943240             | X | Brazil        | Alter do Chão                                                                                 | de Sà et al., 2005         | 02 32 00 S 54 58 00 W |
| <i>Allobates femoralisA</i>     | 56AF                 | EU201064             | X | French Guiana | Petit,saut                                                                                    | New                        | 05 04 00 N 53 03 00 W |
| <i>Allobates femoralisB</i>     | 303MC                | EU201065             | X | French Guiana | Toponowini                                                                                    | New                        | 03 03 10 N 52 42 37 W |
| <i>Allobates femoralisC</i>     | LSUMZ 17552          | DQ283045             | X | Brazil        | Rondonia, Rio Formoso, Parque Estadual Guajira,Mirim, approx. 90 km N Nova Mamore             | Frost et al., 2006         | 10 19 17 S 64 33 47 W |
| <i>Allobates femoralisD</i>     | OMNH 34568           | DQ502089             | O | Brazil        | Para, 101 km S and 15 km E Santarem (near Rio Curua,Una)                                      | Grant et al., 2006         | 03 09 00 S 54 50 00 W |
| <i>Allobates femoralisD</i>     | OMNH 34572           | DQ502090             | O | Brazil        | Para, 101 km S and 15 km E Santarem (near Rio Curua,Una)                                      | Grant et al., 2006         | 03 09 00 S 54 50 00 W |
| <i>Allobates femoralisD</i>     | MPEG 12021           | DQ502220             | X | Brazil        | Para, 101 km S and 15 km E Santarem (near Rio Curua,Una)                                      | Grant et al., 2006         | 03 09 00 S 54 50 00 W |
| <i>Allobates femoralisD</i>     | MPEG 13415           | DQ502088             | O | Brazil        | Rondonia, Parque Estadual Guajara,Mirim                                                       | Grant et al., 2006         | 10 19 17 S 64 33 47 W |
| <i>Allobates femoralisE</i>     | MJH 3976             | DQ502113             | X | Brazil        | Amazonas, Reserva Florestal Adolfo Ducke                                                      | Grant et al., 2006         | 02 58 51 S 59 55 16 W |
| <i>Allobates femoralisE</i>     | AF124106             | AF124106             | O | Brazil        | ?                                                                                             | Vences et al., 2003        |                       |
| <i>Allobates femoralisF</i>     | MJH 7354             | DQ502117             | X | Peru          | Huanuco, Rio Llullapichis, Panguana                                                           | Grant et al., 2006         | 09 23 02 S 75 52 57 W |
| <i>Allobates femoralisF</i>     | AfemRSucv4a          | DQ523023             | O | Peru          | Rio Sucusari Iquitos, Loreto                                                                  | Grant et al., 2006         | 03 14 26 N 72 55 42 W |
| <i>Allobates femoralisF</i>     | AfemTahuiv1b         | DQ523025             | O | Peru          | Tahuayo River Iquitos, Loreto,                                                                | Grant et al., 2006         | 04 11 13 S 73 06 16 W |
| <i>Allobates femoralisF</i>     | AfemShucv3a          | DQ523072             | O | Peru          | Shuchshuyacu Yurimaguas, Loreto,                                                              | Roberts et al., 2006       | 06 00 59 S 75 50 40 W |
| <i>Allobates femoralisG</i>     | OMNH 34102           | DQ502093             | O | Ecuador       | Sucumbios, Estacion Cientifica de Universidad Catolica near Reserva Faunistica Cuyabeno, 220m | Grant et al., 2006         | 00 00 00 S 76 10 00 W |
| <i>Allobates femoralisG</i>     | OMNH 34104           | DQ502094             | O | Ecuador       | Sucumbios, Estacion Cientifica de Universidad Catolica near Reserva Faunistica Cuyabeno, 220m | Grant et al., 2006         | 00 00 00 S 76 10 00 W |
| <i>Allobates femoralisG</i>     | LSU 12798            | DQ502228             | O | Ecuador       | Sucumbios, Estacion Cientifica de Universidad Catolica near Reserva Faunistica Cuyabeno, 220m | Grant et al., 2006         | 00 00 00 S 76 10 00 W |
| <i>Allobates femoralisG</i>     | QCAZ16484            | AY364543             | X | Ecuador       | ?                                                                                             | Santos et al., 2003        |                       |
| <i>Allobates femoralisG</i>     |                      | AF128572             | O | Ecuador       | Cuyabeno                                                                                      | Vences et al., 2003        | 00 15 19 S 75 53 24 W |
| <i>Allobates femoralisH</i>     | WED 55470; KU 205291 | AY326026             | X | Peru          | Madre de Dios, Cusco Amazonico                                                                | Darst and Cannatella, 2003 | 11 39 00 S 70 33 35 W |
| <i>Allobates femoralisH</i>     | WED 55560; KU 205292 | AY326027             | O | Peru          | Madre de Dios, Cusco Amazonico                                                                | Darst and Cannatella, 2003 | 11 39 00 S 70 33 35 W |
| <i>Allobates femoralisH</i>     | KU 215179            | DQ501990             | O | Peru          | Madre de Dios, Cusco Amazonico, 15 km E Puerto Maldonado, 200 m                               | Grant et al., 2006         | 11 39 00 S 70 33 35 W |
| <i>Allobates femoralisH</i>     | KU 215177            | DQ502014             | O | Peru          | Madre de Dios, Cusco Amazonico, 15 km E Puerto Maldonado, 200 m                               | Grant et al., 2006         | 11 39 00 S 70 33 35 W |
| <i>Allobates femoralisH</i>     | KU 215180            | DQ502015             | O | Peru          | Madre de Dios, Cusco Amazonico, 15 km E Puerto Maldonado, 200 m                               | Grant et al., 2006         | 11 39 00 S 70 33 35 W |
| <i>Allobates femoralisH</i>     | AfemBocMan22         | DQ523069             | O | Peru          | Boca Manu Cuzco,                                                                              | Roberts et al., 2006       | 12 16 32 S 70 56 49 W |
| <i>Allobates femoralisI</i>     | OMNH 36066           | DQ502091             | O | Brazil        | Acre, Porto Walter                                                                            | Grant et al., 2006         | 08 15 31 S 72 46 37 W |
| <i>Allobates femoralisI</i>     | OMNH 36070           | DQ502092             | X | Brazil        | Acre, Porto Walter                                                                            | Grant et al., 2006         | 08 15 31 S 72 46 37 W |
| <i>Allobates femoralisI</i>     | OMNH 36073           | DQ502231             | O | Brazil        | Acre, Porto Walter                                                                            | Grant et al., 2006         | 08 15 31 S 72 46 37 W |
| <i>Allobates femoralisJ</i>     | AfemRManv12          | DQ523040             | X | Peru          | Rio Manati Iquitos, Loreto                                                                    | Roberts et al., 2006       |                       |
| <i>Allobates femoralisK</i>     | AfemItaya2ii         | DQ523062             | O | Peru          | Itaya River Iquitos, Loreto                                                                   | Roberts et al., 2006       | 04 27 00 S 73 34 11 W |
| <i>Allobates femoralisK</i>     | AfemNautv5a          | DQ523059             | X | Peru          | Nauta Road Iquitos, Loreto                                                                    | Roberts et al., 2006       | 04 34 14 S 73 46 00 W |
| <i>Allobates femoralisL</i>     | AfemMazukovi         | DQ523055             | X | Peru          | Mazuko Madre de Dios                                                                          | Roberts et al., 2006       |                       |
| <i>Allobates femoralisM</i>     | AfemSapoiv10         | DQ523082             | X | Peru          | Saposa Tarapoto, San Martin,                                                                  | Roberts et al., 2006       | 06 46 15 S 76 56 28 W |

|                              |                 |          |   |               |                                                                    |                           |                       |
|------------------------------|-----------------|----------|---|---------------|--------------------------------------------------------------------|---------------------------|-----------------------|
| <i>Allobates femoralis</i> N | UTA A56478      | DQ502246 | X | Suriname      | Sipaliwini, in the vicinity of Kayser airstrip                     | Grant et al., 2006        | 03 05 70 N 56 28 30 W |
| <i>Allobates granti</i> A    | 38RB            | EU201067 | X | French Guiana | St Eugene                                                          | New                       | 04 51 00 N 53 04 00 W |
| <i>Allobates granti</i> A    | MNHN????        | AY263233 | O | French Guiana | Saül                                                               | Vences et al., 2003       | 03 37 32 N 53 12 26 W |
| <i>Allobates granti</i> B    | 185mc           | EU201066 | X | French Guiana | Trijonction                                                        | New                       | 02 20 00 N 54 36 00 W |
| <i>Allobates granti</i> C    | 148AF           | EU201068 | X | Suriname      | Brownsberg                                                         | New                       | 04 56 31 N 55 10 33 W |
| <i>Allobates granti</i> D    | 49BM            | EU201069 | X | French Guiana | Saül                                                               | New                       | 03 37 32 N 53 12 26 W |
| <i>Allobates granti</i> D    | MNHN2000-651    | AY263230 | O | French Guiana | Saül                                                               | Vences et al., 2003       | 03 37 32 N 53 12 26 W |
| <i>Allobates granti</i> D    | MNHN2000-653    | AY263232 | O | French Guiana | Saül                                                               | Vences et al., 2003       | 03 37 32 N 53 12 26 W |
| <i>Allobates</i> sp.PEG-M3   | MPEG 13385      | DQ502191 |   | Brazil        | Rondonia, Parque Estadual Guajara,Mirim                            | Grant et al., 2006        | 10 19 17 S 64 33 47 W |
| <i>Allobates zaparo</i>      | QCAZ16601       | AY364578 |   | Ecuador       |                                                                    | Santos et al., 2003       |                       |
| <i>Allophryne ruthveni</i> A | 205mc           | EU201098 | X | French Guiana | Cacao                                                              | New                       | 04 34 00 N 52 28 00 W |
| <i>Allophryne ruthveni</i> B | MAD 1512        | AY843564 | X | Guyana        | Kabocali camp, 101 m                                               | Faivovich et al., 2005    | 04 17 10 N 58 30 56 W |
| <i>Allophryne ruthveni</i> C | ?               | AF364512 | X | Brazil        | eastern Amazon near Rio Xingu,                                     | Austin et al., 2001       | 07 39 00 S 51 21 00 W |
| <i>Ameerega hahneli</i> A    | MNHN 2000-656   | AY263247 | X | French Guiana | Trinité                                                            | Vences et al., 2003       | 04 35 00 N 53 21 00 W |
| <i>Ameerega hahneli</i> B    | OMNH 36090      | DQ502085 | O | Brazil        | Acre, Porto Walter                                                 | Grant et al., 2006        | 08 15 31 S 72 46 37 W |
| <i>Ameerega hahneli</i> B    | OMNH 37443      | DQ502081 | O | Brazil        | Amazonas, Castanho, ca. 40 km S Manaus,at km 12 on road to Autazes | Grant et al., 2006        | 03 37 10 S 59 86 78 W |
| <i>Ameerega hahneli</i> B    | MPEG 13849      | DQ502086 | O | Brazil        | Amazonas, Castanho, ca. 40 km S Manaus,at km 12 on road to Autazes | Grant et al., 2006        | 03 37 10 S 59 86 78 W |
| <i>Ameerega hahneli</i> B    | OMNH 37444      | DQ502087 | X | Brazil        | Amazonas, Castanho, ca. 40 km S Manaus,at km 12 on road to Autazes | Grant et al., 2006        | 03 37 10 S 59 86 78 W |
| <i>Ameerega hahneli</i> B    | MPEG 13844      | DQ502226 | O | Brazil        | Amazonas, Castanho, ca. 40 km S Manaus,at km 12 on road to Autazes | Grant et al., 2006        | 03 37 10 S 59 86 78 W |
| <i>Ameerega hahneli</i> B    | EhahnAmazvii1b  | DQ523063 | O | Brazil        | Amazonas                                                           | Roberts et al., 2006      |                       |
| <i>Ameerega hahneli</i> B    | EhahnAmaz1E     | DQ523067 | O | Brazil        | Amazonas                                                           | Roberts et al., 2006      |                       |
| <i>Ameerega hahneli</i> C    | OMNH 36088      | DQ502077 | X | Brazil        | Acre, Porto Walter                                                 | Grant et al., 2006        | 08 15 31 S 72 46 37 W |
| <i>Ameerega hahneli</i> C    | MPEG 12420      | DQ502083 | O | Brazil        | Acre, Porto Walter                                                 | Grant et al., 2006        | 08 15 31 S 72 46 37 W |
| <i>Ameerega hahneli</i> D    | OMNH 36092      | DQ502084 | X | Brazil        | Acre, Porto Walter                                                 | Grant et al., 2006        | 08 15 31 S 72 46 37 W |
| <i>Ameerega hahneli</i> D    | EhahnPWvii1a    | DQ523064 | O | Brazil        | Acre Porto Walter                                                  | Roberts et al., 2006      | 08 15 31 S 72 46 37 W |
| <i>Ameerega hahneli</i> E    |                 | AF282246 | X | Bolivia       | Cobija                                                             | Loetters and Vences, 2000 | 11 01 12 S 68 46 00 W |
| <i>Ameerega hahneli</i> E    | KU 215183       | DQ501991 | O | Peru          | Madre de Dios, Cusco Amazonico, 15 km E Puerto Maldonado, 200 m    | Grant et al., 2006        | 11 39 00 S 70 33 35 W |
| <i>Ameerega hahneli</i> E    | KU 215185       | DQ501996 | X | Peru          | Madre de Dios, Cusco Amazonico, 15 km E Puerto Maldonado, 200 m    | Grant et al., 2006        | 11 39 00 S 70 33 35 W |
| <i>Ameerega hahneli</i> E    | KU 215184       | DQ501997 | O | Peru          | Madre de Dios, Cusco Amazonico, 15 km E Puerto Maldonado, 200 m    | Grant et al., 2006        | 11 39 00 S 70 33 35 W |
| <i>Ameerega hahneli</i> E    | EhahnAP8iii9b   | DQ523034 | O | Peru          | Alto Purus River Ucayali                                           | Roberts et al., 2006      | 09 24 05 S 73 15 29 W |
| <i>Ameerega hahneli</i> E    | EhahnAPR8iii1c  | DQ523041 | O | Peru          | Alto Purus River Ucayali                                           | Roberts et al., 2006      | 09 24 05 S 73 15 29 W |
| <i>Ameerega hahneli</i> E    | EhahnAP8iii9a   | DQ523081 | O | Peru          | Alto Purus River Ucayali                                           | Roberts et al., 2006      | 09 24 05 S 73 15 29 W |
| <i>Ameerega hahneli</i> E    | EhahnBocMan     | DQ523027 | O | Peru          | Boca Manu Cuzco                                                    | Roberts et al., 2006      | 12 16 32 S 70 56 49 W |
| <i>Ameerega hahneli</i> E    | EhahnRAmigosix  | DQ523056 | O | Peru          | Rio Amigos Madre de Dios                                           | Roberts et al., 2006      |                       |
| <i>Ameerega hahneli</i> F    |                 | AF282248 | X | Peru          | Huanuco, Rio Llullapichis,Panguana                                 | Loetters and Vences, 2000 | 09 23 02 S 75 52 57 W |
| <i>Ameerega hahneli</i> G    | QCAZ13325       | AY364573 | X | Ecuador       |                                                                    | Santos et al., 2003       |                       |
| <i>Ameerega hahneli</i> H    | ICN 50410       | DQ502270 | X | Colombia      | Amazonas, Leticia, Lago Yahuaracaca                                | Grant et al., 2006        | 04 10 06 S 69 54 41 W |
| <i>Ameerega hahneli</i> H    | EhahnConviii4   | DQ523032 | O | Peru          | Convento Tarapoto, San Martin                                      | Roberts et al., 2006      | 06 15 03 S 76 18 52 W |
| <i>Ameerega hahneli</i> H    | EhahnItayaiii2  | DQ523033 | X | Peru          | Itaya River Iquitos, Loreto                                        | Roberts et al., 2006      | 04 27 00 S 73 34 11 W |
| <i>Ameerega hahneli</i> H    | EhahnItaya2iii  | DQ523061 | O | Peru          | Itaya River Iquitos, Loreto                                        | Roberts et al., 2006      | 04 27 00 S 73 34 11 W |
| <i>Ameerega hahneli</i> I    | EhahnIvochviii  | DQ523038 | X | Peru          | Ivochote Cuzco                                                     | Roberts et al., 2006      | 12 28 15 S 72 59 37 W |
| <i>Ameerega hahneli</i> J    | EhahnAguamiii3  | DQ523037 | X | Peru          | Aguamo,Muyuma Tarapoto, San Martin                                 | Roberts et al., 2006      | 06 30 42 S 76 28 54 W |
| <i>Ameerega hahneli</i> K    | EhahnSapoiiii9d | DQ523086 | X | Peru          | Saposo Tarapoto, San Martin                                        | Roberts et al., 2006      | 06 46 15 S 76 56 28 W |
| <i>Ameerega hahneli</i> L    |                 | DQ523022 | O | Peru          | Cachiyacu Road Tarapoto, San Martin                                | Roberts et al., 2006      | 06 30 42 S 76 28 54 W |
| <i>Ameerega hahneli</i> L    | EhahnTCRdi6a    | DQ523026 | X | Peru          | Cachiyacu Road Tarapoto, San Martin                                | Roberts et al., 2006      | 06 28 39 S 76 19 21 W |
| <i>Ameerega hahneli</i> L    | EhahnTCRd1      | DQ523078 | O | Peru          | Cachiyacu Road Tarapoto, San Martin                                | Roberts et al., 2006      | 06 28 39 S 76 19 21 W |
| <i>Ameerega hahneli</i> L    | EhahnChaz2B     | DQ523051 | O | Peru          | Near Chazuta Tarapoto, San Martin                                  | Roberts et al., 2006      | 06 58 00 S 76 15 00 W |

|                                       |                |          |   |               |                                                                                           |                           |                       |
|---------------------------------------|----------------|----------|---|---------------|-------------------------------------------------------------------------------------------|---------------------------|-----------------------|
| <i>Ameerega hahneli L</i>             | TSRdviii2      | DQ523079 | O | Peru          | Road to Sisa Tarapoto, San Martin                                                         | Roberts et al., 2006      |                       |
| <i>Ameerega hahneli L</i>             | EhahnVSAiv3a   | DQ523049 | O | Peru          | Valle San Antonio Tarapoto, San Martin                                                    | Roberts et al., 2006      |                       |
| <i>Ameerega hahneli M</i>             | EhahnRManv9a   | DQ523075 | X | Peru          | Loreto, Iquitos Rio Manati                                                                | Roberts et al., 2006      |                       |
| <i>Ameerega trivittata A</i>          | MPEG 12504     | DQ502079 | X | Brazil        | Acre, Porto Walter                                                                        | Grant et al., 2006        | 08 15 31 S 72 46 37 W |
| <i>Ameerega trivittata A</i>          | EtrivAmazvii1d | DQ523065 | O | Brazil        | Amazonas                                                                                  | Grant et al., 2006        |                       |
| <i>Ameerega trivittata A</i>          | MJH 3907       | DQ502112 | O | Brazil        | Amazonas, Base 2 island in reservoir of Uatuma river, 8 km NW represa de Balbina          | Grant et al., 2006        | 01 50 40 S 59 33 43 W |
| <i>Ameerega trivittata A</i>          | OMNH 37453     | DQ502148 | X | Brazil        | Amazonas, Castanho, ca. 40 km S Manaus, at km 12 on road to Autazes                       | Grant et al., 2006        | 03 37 10 S 59 86 78 W |
| <i>Ameerega trivittata A</i>          | OMNH 37455     | DQ502147 | O | Brazil        | Amazonas, Castanho, ca. 40 km S Manaus, at km 12 on road to Autazes                       | Roberts et al., 2006      | 03 37 10 S 59 86 78 W |
| <i>Ameerega trivittata A</i>          | ????????????   | DQ523077 | X | French Guiana | ????????????????????                                                                      | Roberts et al., 2006      |                       |
| <i>Ameerega trivittata A</i>          | BPN 910        | DQ502250 | X | Suriname      | Road to Apura                                                                             | Grant et al., 2006        | 05 11 00 N 55 37 00 W |
| <i>Ameerega trivittata B</i>          | USNM 268846    | DQ502021 | X | Peru          | Madre de Dios, Puerto Maldonado, Explorer's Inn, 30 km (airline) SSW of Tambopata Reserve | Grant et al., 2006        | 12 35 60 S 69 10 60 W |
| <i>Ameerega trivittata B</i>          | USNM 269052    | DQ502023 | O | Peru          | Madre de Dios, Puerto Maldonado, Explorer's Inn, 30 km (airline) SSW of Tambopata Reserve | Grant et al., 2006        | 12 35 60 S 69 10 60 W |
| <i>Ameerega trivittata C</i>          |                | AF098750 | O | ?             | ?                                                                                         | Summers et al., 1999      |                       |
| <i>Ameerega trivittata C</i>          | ZFMK 69880     | AF124128 | O | captive       | ?                                                                                         | Vences et al., 2003       |                       |
| <i>Ameerega trivittata C</i>          |                | DQ523068 | X | Peru          | Cordillera Oriental Amazonas,                                                             | Roberts et al., 2006      | 10 26 00 S 74 31 00 W |
| <i>Ameerega trivittata C</i>          |                | DQ523021 | O | Peru          | Shilcayo Valley Tarapoto, San Martin                                                      | Roberts et al., 2006      |                       |
| <i>Ameerega trivittata C</i>          |                | AF128569 | O | Peru,         | Yurimaguas                                                                                | Vences et al., 2003       | 05 55 05 S 76 05 40 W |
| <i>Ameerega trivittata D</i>          | MPEG 12450     | DQ502082 | O | Brazil        | Acre, Porto Walter                                                                        | Grant et al., 2006        | 08 15 31 S 72 46 37 W |
| <i>Ameerega trivittata D</i>          | MPEG 12447     | DQ502219 | O | Brazil        | Acre, Porto Walter                                                                        | Grant et al., 2006        | 08 15 31 S 72 46 37 W |
| <i>Ameerega trivittata D</i>          | MPEG 12468     | DQ502227 | X | Brazil        | Acre, Porto Walter                                                                        | Grant et al., 2006        | 08 15 31 S 72 46 37 W |
| <i>Ameerega trivittata D</i>          |                | DQ523029 | O | Brazil        | Acre, Porto Walter                                                                        | Roberts et al., 2006      | 08 15 31 S 72 46 37 W |
| <i>Ameerega trivittata D</i>          | ICN 50437      | DQ502267 | X | Colombia      | Amazonas, Leticia, Km 11 (Leticia,Tarapaca)                                               | Grant et al., 2006        | 04 10 06 S 69 54 41 W |
| <i>Ameerega trivittata D</i>          |                | DQ523028 | O | Peru          | Alto Purus River Ucayali,                                                                 | Roberts et al., 2006      | 09 24 05 S 73 15 29 W |
| <i>Ameerega trivittata D</i>          |                | DQ523030 | O | Peru          | Chumilla San Martin,                                                                      | Roberts et al., 2006      | 05 51 23 S 77 02 10 W |
| <i>Ameerega trivittata D</i>          |                | DQ523050 | X | Peru          | Cordillera Azul San Martin,                                                               | Roberts et al., 2006      | 07 26 24 S 76 57 03 W |
| <i>Ameerega trivittata D</i>          |                | DQ523046 | O | Peru          | Iscozazin Pasco                                                                           | Roberts et al., 2006      | 10 11 19 S 75 09 37 W |
| <i>Ameerega trivittata D</i>          |                | DQ523054 | O | Peru          | Near Bonilla Tarapoto, San Martin                                                         | Roberts et al., 2006      | 07 02 46 S 76 47 00 W |
| <i>Ameerega trivittata D</i>          |                | DQ523071 | O | Peru          | Near Chazuta Tarapoto, San Martin                                                         | Roberts et al., 2006      | 06 58 00 S 76 15 00 W |
| <i>Ameerega trivittata D</i>          |                | DQ523031 | O | Peru          | Rio Manati Iquitos, Loreto                                                                | Roberts et al., 2006      |                       |
| <i>Ameerega trivittata D</i>          |                | DQ523058 | O | Peru          | Road to Barranquita Tarapoto, San Martin,                                                 | Roberts et al., 2006      |                       |
| <i>Ameerega trivittata D</i>          |                | DQ523047 | O | Peru          | Santa Rosa Huanuco                                                                        | Roberts et al., 2006      | 08 50 12 S 74 34 17 W |
| <i>Ameerega trivittata D</i>          |                | DQ523035 | O | Peru          | Tahuayo River Iquitos, Loreto,                                                            | Roberts et al., 2006      | 04 11 13 S 73 06 16 W |
| <i>Ameerega trivittata D</i>          |                | DQ523052 | O | Peru          | Tahuayo River Iquitos, Loreto,                                                            | Roberts et al., 2006      | 04 11 13 S 73 06 16 W |
| <i>Ameerega trivittata D</i>          |                | DQ523066 | O | Peru          | Tahuayo River Iquitos, Loreto,                                                            | Roberts et al., 2006      | 04 11 13 S 73 06 16 W |
| <i>Ameerega trivittata D</i>          | LM 739-A       | U39973   | O | Peru,         | Huanuco, Rio Llullapichis,Panguana                                                        | Ruvinski and maxson, 1996 | 09 23 02 S 75 52 57 W |
| <i>Ameerega trivittata E</i>          |                | DQ523036 | X | Peru          | Rio Sucusari Iquitos, Loreto                                                              | Roberts et al., 2006      | 03 14 26 N 72 55 42 W |
| <i>Ameerega trivittata F</i>          | MJH 7483       | DQ502111 | X | Peru          | Huanuco, Rio Llullapichis, Panguana                                                       | Grant et al., 2006        | 09 23 02 S 75 52 57 W |
| <i>Ameerega macero</i>                | LR 742         | DQ502155 |   | Peru          | Madre de Dios, Parque Nacional del Manu                                                   | Grant et al., 2006        | 12 15 00 S 71 45 00 W |
| <i>Anomaloglossus baeobatrachus A</i> | 220MC          | EU201070 | X | French Guiana | Saül                                                                                      | New                       | 03 37 32 N 53 12 26 W |
| <i>Anomaloglossus baeobatrachus A</i> | MNHN1995-9454  | AY263236 | O | French Guiana | Aratai                                                                                    | Vences et al., 2003       | 05 10 00 N 54 20 00 W |
| <i>Anomaloglossus baeobatrachus A</i> | MNHN2000-0654  | AY263231 | O | French Guiana | Saül                                                                                      | Vences et al., 2003       | 03 37 32 N 53 12 26 W |
| <i>Anomaloglossus baeobatrachus B</i> | 148mc          | EU201072 | X | French Guiana | Trijonction                                                                               | New                       | 02 20 00 N 54 36 00 W |
| <i>Anomaloglossus baeobatrachus C</i> | 182mc          | EU201071 | X | French Guiana | Trijonction                                                                               | New                       | 02 20 00 N 54 36 00 W |
| <i>Anomaloglossus baeobatrachus D</i> | 149AF          |          | X | Suriname      | Brownsberg                                                                                | New                       | 04 56 31 N 55 10 33 W |
| <i>Anomaloglossus degranvillei A</i>  | 17RB           | EU201076 | X | French Guiana | St Eugene                                                                                 | New                       | 04 51 00 N 53 04 00 W |
| <i>Anomaloglossus degranvillei B</i>  | 355MC          | EU201075 | X | French Guiana | Lucifer                                                                                   | New                       | 04 46 00 N 53 55 00 W |
| <i>Anomaloglossus degranvillei C</i>  | 68MC           | EU201073 | X | French Guiana | Monts Bakra                                                                               | New                       | 03 18 08 N 52 56 73 W |

|                                        |               |          |          |               |                                                                                                                 |                                          |                       |                       |
|----------------------------------------|---------------|----------|----------|---------------|-----------------------------------------------------------------------------------------------------------------|------------------------------------------|-----------------------|-----------------------|
| <i>Anomaloglossus degranvillei D</i>   | 125BM         | EU201074 | X        | French Guiana | Saül                                                                                                            | New                                      | 03 37 32 N 53 12 26 W |                       |
| <i>Anomaloglossus degranvillei D</i>   | MNHN2000-0655 | AY263234 | O        | French Guiana | Saül                                                                                                            | Vences et al., 2003                      | 03 37 32 N 53 12 26 W |                       |
| <i>Anomaloglossus degranvillei E</i>   | 143AF         | EU201078 | X        | Suriname      | Brownsberg                                                                                                      | New                                      | 04 56 31 N 55 10 33 W |                       |
| <i>Anomaloglossus degranvillei F</i>   | 3025T         | EU201077 | X        | French Guiana | Mitaraka                                                                                                        | New                                      | 02 16 00 N 54 31 00 W |                       |
| <i>Anomaloglossus degranvillei G</i>   | 113MC         | EU201079 | X        | French Guiana | Tibourou                                                                                                        | New                                      | 04 25 00 N 52 18 00 W |                       |
| <i>Anomaloglossus degranvillei H</i>   | 230MC         | EU201080 | X        | French Guiana | Saül                                                                                                            | New                                      | 03 37 32 N 53 12 26 W |                       |
| <i>Anomaloglossus degranvillei I</i>   | 38AF          | EU201081 | X        | French Guiana | Saül                                                                                                            | New                                      | 03 37 32 N 53 12 26 W |                       |
| <i>Anomaloglossus degranvillei J</i>   |               | 278      | DQ502019 | X             | Guyana                                                                                                          | Mereme Mountains                         | Grant et al., 2006    |                       |
| <i>Anomaloglossus degranvillei K</i>   | CPI 10209     | DQ502257 | X        | Guyana        | Mazaruni, Potoro, Mt. Roraima, 1075 m                                                                           | Grant et al., 2006                       | 01 49 19 N 61 52 15 W |                       |
| <i>Anomaloglossus sp. "ayanganna"</i>  | ROM39639      | DQ502129 |          | Guyana        | Mt Ayanganna                                                                                                    | Grant et al., 2006                       | 5 23 00 N 59 59 00 W  |                       |
| <i>Anomaloglossus sp. Tafelberg</i>    | UTA A55758    | DQ502247 |          | Suriname      | Sipaliwini, ca. 4.0 km N of Tafelberg airstrip                                                                  | Grant et al., 2006                       | 03 47 00 N 56 09 00 W |                       |
| <i>Anomaloglossus sp. Brownsberg D</i> | UTA A56469    | DQ502249 |          | Suriname      | Brokopondo, Brownsberg Nature Park                                                                              | Grant et al., 2006                       | 04 43 00 N 56 13 00 W |                       |
| <i>Chaunus granulosis A</i>            | USNM302451    | AY680261 | O        | Brazil        | Roraima, Caracarann                                                                                             | Pauly et al., 2004                       | 03 50 00 N 59 47 00 W |                       |
| <i>Chaunus granulosis A</i>            | USNM302450    | DQ158457 | X        | Brazil        | Roraima                                                                                                         | Pramuk, 2007                             | 03 50 00 N 59 47 00 W |                       |
| <i>Chaunus granulosis A</i>            | 235mc         | EF364306 | X        | French Guiana | Mana                                                                                                            | Fouquet et al., 2007                     | 05 39 00 N 53 47 00 W |                       |
| <i>Chaunus granulosis A</i>            | AMNH A139020  | DQ283332 | X        | Guyana        | Southern Rupununi Savanna, Aishalton (onKubabawau Creek), 150 m                                                 | Frost et al., 2006                       | 02 28 31 N 59 19 16 W |                       |
| <i>Chaunus granulosis A</i>            | 185AF         | EU201056 | X        | Suriname      | Brownsberg                                                                                                      | New                                      | 04 43 00 N 56 13 00 W |                       |
| <i>Chaunus granulosis B</i>            | LM 1493       | AY028483 | X        | Brazil        | Rondonia, Porto Velho                                                                                           | Pramuk, 2001                             | 08 44 38 S 64 04 59 N |                       |
| <i>Chaunus granulosis B</i>            | LM 1493       | AY028496 | O        | Brazil        | Rondonia, Porto Velho                                                                                           | Pramuk, 2001                             | 08 44 38 S 64 04 59 N |                       |
| <i>Chaunus granulosis C</i>            | AF0093        | DQ158458 | X        | Brazil        | Roraima                                                                                                         | Pramuk, 2006                             | 03 50 00 N 59 47 00 W |                       |
| <i>Chiasmocleis hudsoni A</i>          | 28bm          | EU201099 | X        | French Guiana | Monts Bakra                                                                                                     | New                                      | 03 18 08 N 52 56 73 W |                       |
| <i>Chiasmocleis hudsoni B</i>          | 439PG         | EU201100 | X        | French Guiana | Kotika                                                                                                          | New                                      | 03 56 05 N 54 12 17 W |                       |
| <i>Ctenophryne geayi</i>               | 21bm          | EU201103 | X        | French Guiana | Trinité                                                                                                         | New                                      | 04 35 00 N 53 21 00 W |                       |
| <i>Ctenophryne geayi</i>               | AMNH A166444  | DQ283383 | X        | Guyana        | Berbice River camp at ca. 18 mi (linear) SW Kwakwani (ca. 2 mi downriver from Kurundi River confluence), 200 ft | Frost et al., 2006                       | 05 05 06 N 58 14 14 W |                       |
| <i>Dendrobates azureus</i>             | CFBH 4203     | AY263250 |          | Brazil        | uncertain possibly Alto rio trombetas                                                                           | Vences et al., 2003                      |                       |                       |
| <i>Dendrobates tinctorius A</i>        | 1mc           | EU201082 | X        | French Guiana | Ouanary                                                                                                         | New                                      | 04 15 00 N 51 40 00 W |                       |
| <i>Dendrobates tinctorius B</i>        | UTA A56495    | DQ502248 | X        | Suriname      | Sipaliwini, ca. 1.0 km N of Tafelberg airstrip                                                                  | Grant et al., 2006                       | 03 47 00 N 56 09 00 W |                       |
| <i>Dendrophryniscus minutus A</i>      | 98bm          | EF364310 | X        | French Guiana | Mt Arawa                                                                                                        | Fouquet et al., 2007                     | 02 48 59 N 53 21 59 W |                       |
| <i>Dendrophryniscus minutus B</i>      | 3035T         | EU201057 | X        | French Guiana | Mitaraka                                                                                                        | New                                      | 02 16 00 N 54 31 00 W |                       |
| <i>Dendrophryniscus minutus C</i>      | QCAZ13965     | AF375516 | X        | Ecuador       | ?                                                                                                               | Gluesenkamp, unpublished                 |                       |                       |
| <i>Dendrophryniscus minutus D</i>      | QCAZ 883      | DQ158420 | X        | Ecuador       | ?                                                                                                               | Pramuk, 2006                             |                       |                       |
| <i>Dendrophryniscus minutus E</i>      | MJH7095       | AY843582 | X        | Peru          | Huanuco, Rio Lullapichis, Panguana                                                                              | Faivovich et al., 2005                   | 09 23 02 S 75 52 57 W |                       |
| <i>Dendropsophus brevifrons</i>        | 28mc          | EF376058 | X        | French Guiana | Kaw                                                                                                             | Salducci et al., 2005                    | 04 42 00 N 52 18 00 W |                       |
| <i>Dendropsophus brevifrons</i>        | MJH 7101      | AY843611 | X        | Peru          | Huanuco, Rio Lullapichis, Panguana                                                                              | Faivovich et al., 2005                   | 09 23 02 S 75 52 57 W |                       |
| <i>Dendropsophus leucophyllatus A</i>  | Man-95231     | AF308091 | O        | Brazil        | Manaus, Amazonas                                                                                                | Chek et al., 2001                        | 02 28 00 S 60 00 57 W |                       |
| <i>Dendropsophus leucophyllatus A</i>  | Man-95232     | AF308092 | X        | Brazil        | Manaus, Amazonas                                                                                                | Chek et al., 2001                        | 02 28 00 S 60 00 57 W |                       |
| <i>Dendropsophus leucophyllatus A</i>  | SdN-95143     | AF308087 | O        | Brazil        | Serra do Navio, Amapa                                                                                           | Chek et al., 2001                        | 00 55 05 N 52 00 10 W |                       |
| <i>Dendropsophus leucophyllatus A</i>  | SdN-95156     | AF308088 | X        | Brazil        | Serra do Navio, Amapa                                                                                           | Chek et al., 2001                        | 00 55 05 N 52 00 10 W |                       |
| <i>Dendropsophus leucophyllatus A</i>  |               | 95161    | DQ393416 | O             | Brazil                                                                                                          | Alter do Chão                            | Lougheed et al., 2006 | 02 32 00 S 54 58 00 W |
| <i>Dendropsophus leucophyllatus A</i>  |               | 95232    | DQ393427 | O             | Brazil                                                                                                          | approx. 100 km north of Manaus, Amazonas | Lougheed et al., 2006 | 02 28 00 S 60 00 57 W |
| <i>Dendropsophus leucophyllatus A</i>  |               | 95193    | DQ393428 | O             | Brazil                                                                                                          | approx. 100 km north of Manaus, Amazonas | Lougheed et al., 2006 | 02 28 00 S 60 00 57 W |
| <i>Dendropsophus leucophyllatus A</i>  |               | 95143    | DQ393417 | O             | Brazil                                                                                                          | Serra do Navio, Amapa                    | Lougheed et al., 2006 | 00 55 05 N 52 00 10 W |
| <i>Dendropsophus leucophyllatus A</i>  | 36mc          | EF376059 | X        | French Guiana | Kaw                                                                                                             | Salducci et al., 2005                    | 04 42 00 N 52 18 00 W |                       |
| <i>Dendropsophus leucophyllatus B</i>  | R.Bran-95253  | AF308097 | O        | Brazil        | Rio Branco, Acre                                                                                                | Chek et al., 2001                        | 09 58 00 S 67 48 00 W |                       |
| <i>Dendropsophus leucophyllatus B</i>  |               | 93044    | DQ393421 | X             | Brazil                                                                                                          | approx. 200km west of Redenção, Para     | Lougheed et al., 2006 | 07 40 00 S 51 22 00 W |
| <i>Dendropsophus leucophyllatus B</i>  |               | 95253    | DQ393432 | X             | Brazil                                                                                                          | Rio Branco, Acre                         | Lougheed et al., 2006 | 09 58 00 S 67 48 00 W |
| <i>Dendropsophus leucophyllatus B</i>  |               | 95254    | DQ393433 | O             | Brazil                                                                                                          | Rio Branco, Acre                         | Lougheed et al., 2006 | 09 58 00 S 67 48 00 W |

|                                         |                   |          |   |               |                                                                        |                            |                       |
|-----------------------------------------|-------------------|----------|---|---------------|------------------------------------------------------------------------|----------------------------|-----------------------|
| <i>Dendropsophus leucophyllatus C</i>   | AdC-95163         | AF308089 | X | Brazil        | Alter do Chão                                                          | Chek et al., 2001          | 02 33 00 S 54 59 00 W |
| <i>Dendropsophus leucophyllatus C</i>   | 95163             | DQ393419 | O | Brazil        | Alter do Chão                                                          | Lougheed et al., 2006      | 02 32 00 S 54 58 00 W |
| <i>Dendropsophus leucophyllatus D</i>   | 95162             | DQ393422 | X | Brazil        | Alter do Chão                                                          | Lougheed et al., 2006      | 02 32 00 S 54 58 00 W |
| <i>Dendropsophus leucophyllatus E</i>   | Aukre-93045       | AF308085 | X | Brazil        | A,Ukre, Para                                                           | Chek et al., 2001          | 07 40 00 S 51 22 00 W |
| <i>Dendropsophus leucophyllatus E</i>   | Aukre-93046       | AF308086 | O | Brazil        | A,Ukre, Para                                                           | Chek et al., 2001          | 07 40 00 S 51 22 00 W |
| <i>Dendropsophus leucophyllatus E</i>   | 93042, 93043      | DQ393418 | O | Brazil        | approx. 200km west of Redenção, Para                                   | Lougheed et al., 2006      | 07 40 00 S 51 22 00 W |
| <i>Dendropsophus leucophyllatus F</i>   | 93049             | DQ393420 | X | Brazil        | approx. 200km west of Redenção, Para                                   | Lougheed et al., 2006      | 07 40 00 S 51 22 00 W |
| <i>Dendropsophus leucophyllatus G</i>   | Jur-4483 INPA4483 | AF308096 | O | Brazil        | Nova Vida, Acre                                                        | Chek et al., 2001          | 08 35 00 S 72 50 00 W |
| <i>Dendropsophus leucophyllatus G</i>   | Obd-95176         | AF308090 | X | Brazil        | Obidos, Pará                                                           | Chek et al., 2001          | 01 55 00 S 55 31 00 W |
| <i>Dendropsophus leucophyllatus G</i>   | Jur-4273 INPA4273 | AF308095 | X | Brazil        | Porongaba, Acre                                                        | Chek et al., 2001          | 08 41 00 S 72 48 00 W |
| <i>Dendropsophus leucophyllatus G</i>   | Tab-96056         | AF308094 | O | Brazil        | Tabatinga, Amazonas                                                    | Chek et al., 2001          | 04 16 00 S 69 58 00 W |
| <i>Dendropsophus leucophyllatus G</i>   | 4273              | DQ393431 | O | Brazil        | Igarapé Porongaba, Acre                                                | Lougheed et al., 2006      | 08 40 00 S 72 47 00 W |
| <i>Dendropsophus leucophyllatus G</i>   | 4483              | DQ393430 | O | Brazil        | Nova Vida, Acre                                                        | Lougheed et al., 2006      | 08 22 00 S 72 49 00 W |
| <i>Dendropsophus leucophyllatus G</i>   | 95175             | DQ393423 | O | Brazil        | Obidos, Pará                                                           | Lougheed et al., 2006      | 01 55 00 S 55 31 00 W |
| <i>Dendropsophus leucophyllatus G</i>   | 95176             | DQ393424 | O | Brazil        | Obidos, Pará                                                           | Lougheed et al., 2006      | 01 55 00 S 55 31 00 W |
| <i>Dendropsophus leucophyllatus G</i>   | 95178             | DQ393425 | O | Brazil        | Obidos, Pará                                                           | Lougheed et al., 2006      | 01 55 00 S 55 31 00 W |
| <i>Dendropsophus leucophyllatus G</i>   | 95172             | DQ393426 | O | Brazil        | Obidos, Pará                                                           | Lougheed et al., 2006      | 01 55 00 S 55 31 00 W |
| <i>Dendropsophus leucophyllatus G</i>   | Tab-96018         | AF308093 | O | Brazil        | Tabatinga, Amazonas                                                    | Lougheed et al., 2006      | 04 16 00 S 69 58 00 W |
| <i>Dendropsophus leucophyllatus G</i>   | 96023             | DQ393429 | O | Brazil        | Tabatinga, Amazonas                                                    | Lougheed et al., 2006      | 04 16 00 S 69 58 00 W |
| <i>Dendropsophus leucophyllatus G</i>   | 96034             | DQ393434 | O | Brazil        | Tabatinga, Amazonas                                                    | Lougheed et al., 2006      | 04 16 00 S 69 58 00 W |
| <i>Dendropsophus leucophyllatus G</i>   | 96009, 96018      | DQ393435 | O | Brazil        | Tabatinga, Amazonas                                                    | Lougheed et al., 2006      | 04 16 00 S 69 58 00 W |
| <i>Dendropsophus leucophyllatus G</i>   | 96019, 96020      | DQ393436 | O | Brazil        | Tabatinga, Amazonas                                                    | Lougheed et al., 2006      | 04 16 00 S 69 58 00 W |
| <i>Dendropsophus minutus A</i>          | 114mc             | EF376063 | X | French Guiana | Kaw                                                                    | Salducci et al., 2005      | 04 42 00 N 52 18 00 W |
| <i>Dendropsophus minutus B</i>          | MZUSP70297        | AF308112 | O | Brazil        | A,Ukre, Para                                                           | Chek et al 01              | 07 40 00 S 51 22 00 W |
| <i>Dendropsophus minutus B</i>          | MZUSP70296        | AF308113 | X | Brazil        | A,Ukre, Para                                                           | Chek et al 01              | 07 40 00 S 51 22 00 W |
| <i>Dendropsophus minutus C</i>          | MACN 33799        | AY549345 | X | Argentina     | Misiones, Guarani, San Vicente, Campo Anexo INTA 'Cuartel Rio Victoria | Faivovich et al., 2004     | 26 56 00 S 54 24 00 W |
| <i>Dendropsophus nanus A</i>            | 170bm             | EU201104 | X | French Guiana | Kaw                                                                    | New                        | 04 42 00 N 52 18 00 W |
| <i>Dendropsophus nanus A</i>            | 84mc              | EF376063 | O | French Guiana | Kaw                                                                    | Salducci et al., 2005      | 04 42 00 N 52 18 00 W |
| <i>Dendropsophus nanus B</i>            | MACN 37785        | AY549346 | X | Argentina     | Entre Rios, Dto. Islas del Ibicuy                                      | Faivovich et al., 2004     | 32 07 02 S 59 18 15 W |
| <i>Dendropsophus triangulum</i>         | KU202745          | AY326053 |   | Ecuador       | Napo, Misahualli, 600 m                                                | Darst and Cannatella, 2003 | 01 02 00 S 77 40 13 W |
| <i>Dendropsophus walfordi</i>           | MJH 129           | AY843683 |   | Brazil        | ?                                                                      | Faivovich et al., 2005     |                       |
| <i>Elachistocleis ovalis</i>            | 82mc              | EU201101 | X | French Guiana | Montjoly                                                               | New                        | 04 55 00 N 52 16 00 W |
| <i>Elachistocleis ovalis</i>            | AMNH A141136      | DQ283405 | X | Guyana        | Dubulay Ranch on the Berbice River, 200ft                              | Frost et al 06             | 05 40 55 N 57 51 32 W |
| <i>Eleutherodactylus chiastonotus A</i> | 101mc             | EU201060 | X | French Guiana | Tibourou                                                               | New                        | 04 25 00 N 52 18 00 W |
| <i>Eleutherodactylus chiastonotus B</i> | 162AF             | EU201061 | X | Suriname      | Brownsberg                                                             | New                        | 04 56 31 N 55 10 33 W |
| <i>Eleutherodactylus marmoratus A</i>   | 110bm             | EU201063 | X | French Guiana | Kaw                                                                    | New                        | 04 42 00 N 52 18 00 W |
| <i>Eleutherodactylus marmoratus B</i>   | 77mc              | EU201062 | X | French Guiana | Trois saut                                                             | New                        | 02 14 00 N 52 52 00 W |
| <i>Eleutherodactylus zeuctotylus A</i>  | 95mc              | EF376083 | X | French Guiana | Tibourou                                                               | Salducci et al., 2005      | 04 25 00 N 52 18 00 W |
| <i>Eleutherodactylus zeuctotylus B</i>  | 100AF             | EU201059 | X | Suriname      | Road to Apura                                                          | New                        | 05 11 00 N 55 39 00 W |
| <i>Engystomops petersi</i>              | QCAZ 11965        | DQ337231 | O | Ecuador       | Napo, Cando                                                            | Ron et al., 2006           |                       |
| <i>Engystomops petersi</i>              | QCAZ 14723        | DQ337232 | O | Ecuador       | Napo, Napo, Galeras, Ishquiñambi                                       | Ron et al., 2006           |                       |
| <i>Engystomops petersi</i>              | QCAZ 12128        | DQ337233 | O | Ecuador       | Orellana, Estación Científica Yasuní, Universidad Católica del Ecuador | Ron et al., 2006           | 00 40 00 S 76 23 00 W |
| <i>Engystomops petersi A</i>            | 108bm             | EU201097 | X | French Guiana | Trinité                                                                | New                        | 04 35 00 N 53 21 00 W |
| <i>Engystomops petersi B</i>            | QCAZ 23976        | DQ337234 | X | Ecuador       | Sucumbíos, La Selva                                                    | Ron et al., 2006           | 00 00 33 S 76 35 23 W |
| <i>Engystomops petersi C</i>            | QCAZ 26210        | DQ337230 | X | Ecuador       | Pastaza, El Puyo                                                       | Ron et al., 2006           | 01 29 04 S 78 00 38 W |
| <i>Hamptophryne boliviana A</i>         |                   | AF215370 | O | ?????         | ????????????????????????????????????                                   | Vences, 2000               |                       |
| <i>Hamptophryne boliviana A</i>         | 104bm             | EU201102 | X | French Guiana | Trinité                                                                | New                        | 04 35 00 N 53 21 00 W |

|                                                  |                            |          |   |               |                                                                                        |                            |                       |
|--------------------------------------------------|----------------------------|----------|---|---------------|----------------------------------------------------------------------------------------|----------------------------|-----------------------|
| <i>Hamptophryne boliviana B</i>                  | Rafael de Sa               | DQ283438 | X | Peru          | ?                                                                                      | Frost et al., 2006         |                       |
| <i>Hypsiboas boans A</i>                         | 43mc                       | EU201105 | X | French Guiana | Kaw                                                                                    | New                        | 04 42 00 N 52 18 00 W |
| <i>Hypsiboas boans A</i>                         | 99bm                       | EF376055 |   | French Guiana | Monts Bakra                                                                            | Salducci et al., 2005      | 03 18 08 N 52 56 73 W |
| <i>Hypsiboas boans A</i>                         | RWM 17746                  | AY843610 | X | Venezuela     | Amazonas, Cano Agua Blanca, 3.5 Km SE Neblina Base Camp on Rio Mawarinuma (=Rio Baria) | Faivovich et al., 2005     | 00 49 50 N 66 09 40 W |
| <i>Hypsiboas calcaratus A</i>                    | 131mc                      | EF376064 | X | French Guiana | Crique margot                                                                          | Salducci et al., 2005      | 05 28 00 N 53 57 00 W |
| <i>Hypsiboas calcaratus B</i>                    | NMP6V 71250                | AY843613 | X | Peru          | Anguilla, 50 km W of Iquitos                                                           | Faivovich et al., 2005     | 03 43 47 S 73 49 51 W |
| <i>Hypsiboas calcaratus C</i>                    | WED 54086; KU 202911       | AY326056 | X | Ecuador       | Napo, Misahualli, 600 m                                                                | Darst and Cannatella, 2003 | 01 02 00 S 77 40 13 W |
| <i>Hypsiboas crepitans A</i>                     | 95bm                       | EU201107 | X | French Guiana | Mont St Marcel                                                                         | New                        | 02 23 09 N 53 00 68 W |
| <i>Hypsiboas crepitans B</i>                     | CFBH2966                   | AY843621 | X | Brazil        | Alagoas, Municipio de Piranhas, Represa de Xingo                                       | Faivovich et al., 2005     | 09 39 22 S 36 42 08 W |
| <i>Hypsiboas fasciatus A</i>                     | 229mc                      | EU201108 | X | French Guiana | Saül                                                                                   | New                        | 03 37 32 N 53 12 26 W |
| <i>Hypsiboas fasciatus A</i>                     | AMNH-A 164081              | AY549335 | X | Guyana        | Iwokrama, Cowfly camp                                                                  | Faivovich et al., 2004     | 04 40 17 N 58 41 06 W |
| <i>Hypsiboas fasciatus A</i>                     | 97AF                       | EU201109 | X | Suriname      | Road to Apura                                                                          | New                        | 05 11 00 N 55 39 00 W |
| <i>Hypsiboas fasciatus B</i>                     | 168mc                      | EF376065 | X | French Guiana | Guatemala                                                                              | Salducci et al., 2005      | 05 09 00 N 52 38 00 W |
| <i>Hypsiboas geographicus A</i>                  | 33mc                       | EF376054 | X | French Guiana | Grand,Santi                                                                            | Salducci et al., 2005      | 04 20 00 N 54 15 00 W |
| <i>Hypsiboas geographicus A</i>                  | AMNH-A-141054; AMCC 101481 | AY843628 | X | Guyana        | Warniabo Creek, 4 mi (by rd) SW Dubulay Ranch house                                    | Faivovich et al., 2005     | 05 37 56 N 57 53 55 W |
| <i>Hypsiboas geographicus B</i>                  | 171bm                      | EU201106 | X | French Guiana | Trinité                                                                                | New                        | 04 35 00 N 53 21 00 W |
| <i>Hypsiboas granosus A</i>                      | 189bm                      | EU201113 | X | French Guiana | Trinité                                                                                | New                        | 04 35 00 N 53 21 00 W |
| <i>Hypsiboas granosus B</i>                      | AMNH-A 164105              | AY549336 | X | Guyana        | Iwokrama, Muri Scrub camp                                                              | Faivovich et al., 2004     | 04 40 17 N 58 41 06 W |
| <i>Hypsiboas multifasciatus A</i>                | 241mc                      | EU201111 | X | French Guiana | Saül                                                                                   | New                        | 03 37 32 N 53 12 26 W |
| <i>Hypsiboas multifasciatus A</i>                | 38mc                       | EF376057 |   | French Guiana | Kaw                                                                                    | Salducci et al., 2005      | 04 42 00 N 52 18 00 W |
| <i>Hypsiboas multifasciatus B</i>                | 47AF                       | EU201110 | X | French Guiana | Petit,saut                                                                             | New                        | 05 04 00 N 53 03 00 W |
| <i>Hypsiboas multifasciatus B</i>                | AMNH-A-141054; AMCC 101446 | AY843648 | X | Guyana        | Demerara, Ceiba Station, Madewini River, ca 3 mi (linear) E Timehri Airport            | Faivovich et al., 2005     | 06 28 24 N 58 03 16 W |
| <i>Hypsiboas punctatus A</i>                     | 193AF                      | EU201112 | X | French Guiana | Mana                                                                                   | New                        | 05 39 00 N 53 47 00 W |
| <i>Hypsiboas punctatus B</i>                     | MACN 37792                 | AY549353 | X | Argentina     | Chaco, Resistencia, Camino a Isla del Cerrito                                          | Faivovich et al., 2004     | 27 14 01 S 58 37 00 W |
| <i>Hypsiboas raniceps A</i>                      | 15mc                       | AF467269 | X | French Guiana | Crique yiyi                                                                            | Salducci et al., 2002      | 05 29 00 N 53 09 00 W |
| <i>Hypsiboas raniceps B</i>                      | MACN 37795                 | AY843657 | X | Argentina     | Santa Fe, Vera, Ea. 'Las Gamas'                                                        | Faivovich et al., 2005     | 29 28 01 S 60 12 08 W |
| <i>Hypsiboas semilineatus</i>                    | CFBH 5424                  | AY843779 |   | Brazil        | Rio de Janeiro, Duque de Caxias                                                        | Faivovich et al., 2005     | 22 47 00 S 43 15 49 W |
| <i>Leptodactylus fuscus E</i>                    | USNM284551                 | AY911279 | X | Brazil        | Pernambuco                                                                             | Camargo et al., 2005       |                       |
| <i>Leptodactylus gr. wagneri A</i>               | 81mc                       | EU201128 | X | French Guiana | Montjoly                                                                               | New                        | 04 55 00 N 52 16 00 W |
| <i>Leptodactylus gr. wagneri B</i>               | 51bm                       | EU201125 | X | French Guiana | Kaw                                                                                    | New                        | 04 42 00 N 52 18 00 W |
| <i>Leptodactylus gr. wagneri C</i>               | 170mc                      | EU201126 | X | French Guiana | Apatou                                                                                 | New                        | 05 10 00 N 54 20 00 W |
| <i>Leptodactylus gr. wagneri D</i>               | 66bm                       | EU201127 | X | French Guiana | Mt Arawa                                                                               | New                        | 02 48 59 N 53 21 59 W |
| <i>Leptodactylus gr. wagneri E</i>               | 215mc                      | EU201129 | X | French Guiana | Apatou                                                                                 | New                        | 05 10 00 N 54 20 00 W |
| <i>Leptodactylus gr. wagneri F</i>               | 78bm                       | EU201130 | X | French Guiana | Trinité                                                                                | New                        | 04 35 00 N 53 21 00 W |
| <i>Leptodactylus gr. wagneri G</i>               | 183af                      | EU201131 | X | Suriname      | Road to Apura                                                                          | New                        | 05 11 00 N 55 39 00 W |
| <i>Leptodactylus gr. wagneri H</i>               | 155mc                      | EU201132 | X | French Guiana | Kaw                                                                                    | New                        | 04 42 00 N 52 18 00 W |
| <i>Leptodactylus gr. wagneri I</i>               | 129af                      | EU201133 | X | Suriname      | Brownsberg                                                                             | New                        | 04 56 31 N 55 10 33 W |
| <i>Leptodactylus gr. wagneri J adenomera sp.</i> | AMNH-A 166312              | AY843561 | X | Guyana        | Berebice River camp at ca 18 mi SWKwakwani, ca. 2 mi downriver from Kurundi River      | Faivovich et al., 2005     | 05 05 06 N 58 14 14 W |
| <i>Leptodactylus knudseni A</i>                  | 52AF                       | EU201135 | X | French Guiana | Petit,saut                                                                             | New                        | 05 04 00 N 53 03 00 W |
| <i>Leptodactylus knudseni B</i>                  | QCAZ13077                  | AY947863 | X | Ecuador       | Francisco de Orellana, Parque Nacional Yasuní, Napo                                    | Heyer et al., 2005         | 00 26 56 S 77 00 55 W |
| <i>Leptodactylus leptodactyloides</i>            | MZUSP 70969                | AY943236 | X | Brazil        | Para, Serra de Kokoinhokren                                                            | de Sà et al., 2005         | 07 46 00 S 51 57 00 W |
| <i>Leptodactylus longirostris A</i>              | 76bm                       | EU201119 | X | French Guiana | Mont arawa                                                                             | New                        | 02 48 59 N 53 21 59 W |
| <i>Leptodactylus longirostris B</i>              | 199mc                      | EU201120 | X | French Guiana | Grand santi                                                                            | New                        | 04 20 00 N 54 15 00 W |
| <i>Leptodactylus longirostris B</i>              | 103AF                      | EU201121 | X | Suriname      | Road to Apura                                                                          | New                        | 05 11 00 N 55 39 00 W |
| <i>Leptodactylus mystaceus A</i>                 | 134MC                      | EU201117 | X | French Guiana | Crique margot                                                                          | New                        | 05 28 00 N 53 57 00 W |
| <i>Leptodactylus mystaceus B</i>                 | 115AF                      | EU201116 | X | Suriname      | Brownsberg                                                                             | New                        | 04 56 31 N 55 10 33 W |
| <i>Leptodactylus mystaceus C</i>                 | 73AF                       | EU201118 | X | French Guiana | St georges                                                                             | New                        | 03 52 00 N 51 48 00 W |

|                                      |                    |                    |   |               |                                                                                                      |                            |                       |
|--------------------------------------|--------------------|--------------------|---|---------------|------------------------------------------------------------------------------------------------------|----------------------------|-----------------------|
| <i>Leptodactylus mystaceus D</i>     | 167mc              | EU201115           | X | French Guiana | Kaw                                                                                                  | New                        | 04 42 00 N 52 18 00 W |
| <i>Leptodactylus mystaceus E</i>     | 1126BPN            | EU201114           | X | Guyana        | Imbaimadai                                                                                           | New                        | 05 44 23 N 60 17 51 W |
| <i>Leptodactylus mystaceus F</i>     | MZUSP 70371        | AY911286           | X | Brazil        | Pará, Serra de Kukoinhokren                                                                          | Camargo et al., 2005       | 07 46 00 S 51 57 00 W |
| <i>Leptodactylus ocellatus A</i>     | 45mc               | EU201124           | X | French Guiana | Guatemala                                                                                            | New                        | 05 09 00 N 52 38 00 W |
| <i>Leptodactylus ocellatus B</i>     | MACN 38648         | AY843688           | X | Argentina     | Buenos Aires, Escobar, Loma Verde, Ea. 'Los Cipreses'                                                | Faivovich et al., 2005     | 35 16 56 S 58 25 18 W |
| <i>Leptodactylus ocellatus B</i>     | KU 289191          | DQ158417           | X | Paraguay      | Parque Nacional San Rafael                                                                           | Pramuk, 2006               | 26 25 00 S 55 45 00 W |
| <i>Leptodactylus ocellatus C</i>     | MZUSP 68993        | AY162395           | X | Brazil        | SANTA CATARINA, Campeche                                                                             | Nuin, 2002                 | 27 40 17 S 48 28 33 W |
| <i>Leptodactylus pentadactylus A</i> | USNM 303466        | AY947868           | X | Brazil        | Para, near Cachoeira do Espelho, ca. 50 km (airline) S of Altamira                                   | Heyer et al., 2005         | 03 37 03 S 52 10 26 W |
| <i>Leptodactylus pentadactylus A</i> | MZUSP 70917        | AY947867           | O | Brazil        | Pará, Serra de Kukoinhokren.                                                                         | Heyer et al., 2005         | 07 46 00 S 51 57 00 W |
| <i>Leptodactylus pentadactylus A</i> | 181mc              | EU201134           | X | French Guiana | Tibourou                                                                                             | New                        | 04 25 00 N 52 18 00 W |
| <i>Leptodactylus pentadactylus B</i> | MZUSP 70023        | AY947856           | X | Brazil        | Pará, Aldeia A,Ukre                                                                                  | Heyer et al., 2005         | 03 37 23 S 49 20 32 W |
| <i>Leptodactylus pentadactylus B</i> | MZUSP 70075        | AY947857           | O | Brazil        | Pará, Rio Vermelho                                                                                   | Heyer et al., 2005         |                       |
| <i>Leptodactylus pentadactylus C</i> | QCAZ 17056         | AY947864           | X | Ecuador       | Esmeraldas, Alto Tambo.                                                                              | Heyer et al., 2005         | 00 54 05 N 78 32 39 W |
| <i>Leptodactylus pentadactylus C</i> | QCAZ 19859         | AY947865           | O | Ecuador       | Esmeraldas, Bosque Protector La Perla                                                                | Heyer et al., 2005         | 00 00 26 S 78 23 02 W |
| <i>Leptodactylus pentadactylus D</i> | C13095; MVZ.233238 | AY326017           | X | Costa Rica    | Limon, Rio Penitencia, 2 mi N Tortuguero                                                             | Darst and Cannatella, 2003 | 10 35 31 N 83 31 40 W |
| <i>Leptodactylus pentadactylus D</i> | USNM 534219        | AY947862           | O | Honduras      | Colon, Quebrada Machin                                                                               | Heyer et al., 2005         | 15 33 18 N 85 42 45 W |
| <i>Leptodactylus pentadactylus D</i> | USNM 347153        | AY943238           | O | Panama        | Bocas del Toro, Isla Popa                                                                            | Heyer et al., 2005         | 09 09 09 N 82 07 57 W |
| <i>Leptodactylus pentadactylus D</i> | USNM 298079        | AY947866           | O | Panama        | Bocas del Toro, Isla Popa                                                                            | Heyer et al., 2005         | 09 09 09 N 82 07 57 W |
| <i>Leptodactylus rhodomystax A</i>   | 213mc              | EU201122           | X | French Guiana | Montagne des singes                                                                                  | New                        | 05 04 00 N 52 43 00 W |
| <i>Leptodactylus rhodomystax B</i>   | 1248BPN            | EU201123           | X | Guyana        | Imbaimadai                                                                                           | New                        | 05 44 23 N 60 17 51 W |
| <i>Leptodactylus rhodomystax C</i>   | MZUSP 70375        | AY947855           | X | Brazil        | Pará, Serra de Kukoinhokren.                                                                         | Heyer et al., 2005         | 07 46 00 S 51 57 00 W |
| <i>Leptodactylus fuscus A</i>        | MZUSP67073         | AY911264           | X | Brazil        | Roraima, Caracaranã, near Normandia                                                                  | Camargo et al., 2005       | 03 50 00 N 59 47 00 W |
| <i>Leptodactylus fuscus A</i>        | USNM291363         | AY911273           | X | French Guiana | Cayenne, Sinnamary                                                                                   | Camargo et al., 2005       | 05 23 00 N 52 57 00 W |
| <i>Leptodactylus fuscus A</i>        | USNM497739         | AY911284           | O | Guyana        | East Berbice, Region 10 cty.                                                                         | Camargo et al., 2005       | 06 17 26 N 57 51 34 W |
| <i>Leptodactylus fuscus A</i>        | AMNH A139088       | DQ283404           | X | Guyana        | Southern Rupununi Savanna, Aishalton (onKubabawau Creek), 150 m                                      | Frost et al., 2006         | 02 28 31 N 59 19 16 W |
| <i>Leptodactylus fuscus B</i>        | USNM306189         | AY911269           | X | Panamá        | Tocumen, Panamá City                                                                                 | Camargo et al., 2005       | 09 02 40 N 79 22 57 W |
| <i>Leptodactylus fuscus C</i>        | USNM306067         | AY911265           | O | Tobago        | Saint Paul, Roxborough                                                                               | Camargo et al., 2005       | 11 15 00 N 60 35 00 W |
| <i>Leptodactylus fuscus C</i>        | USNM306149         | AY911276           | O | Trinidad      | Saint George, Arima,                                                                                 | Camargo et al., 2005       | 10 38 03 N 61 16 49 W |
| <i>Leptodactylus fuscus C</i>        | USNM306123         | AY911270           | O | Trinidad      | Manzanilla Mayaro Road, Nariva                                                                       | Camargo et al., 2005       | 10 22 24 N 61 09 28 W |
| <i>Leptodactylus fuscus C</i>        | USNM287012         | AY911272           | X | Trinidad      | Saint Patrick, Iacos Point                                                                           | Camargo et al., 2005       | 10 07 22 N 61 40 47 W |
| <i>Leptodactylus fuscus D</i>        | MZUSP67039         | AY911277           | O | Brazil        | Roraima, Bôa Vista                                                                                   | Camargo et al., 2005       | 02 44 14 N 60 42 40 W |
| <i>Leptodactylus fuscus D</i>        | MZUSP76019         | AY911278           | X | Brazil        | Roraima, Igarapé Cocal                                                                               | Camargo et al., 2005       | 03 45 00 N 61 44 00 W |
| <i>Leptodactylus fuscus D</i>        |                    | AY263226           | O | Venezuela     | Canaima                                                                                              | Vences et al., 2003        | 06 13 58 N 62 50 59 W |
| <i>Leptodactylus fuscus E</i>        | FML04789           | AY911274           | X | Argentina     | Salta, Embarcación                                                                                   | Camargo et al., 2005       | 23 12 48 S 64 08 27 W |
| <i>Leptodactylus fuscus E</i>        | USNMF5174020       | AY911267           | X | Bolivia       | La Paz, Palos Blancos                                                                                | Camargo et al., 2005       | 15 34 00 S 67 16 00 W |
| <i>Leptodactylus fuscus F</i>        | USNM303149         | AY911266           | O | Brazil        | São Paulo, Luiz Antonio                                                                              | Camargo et al., 2005       |                       |
| <i>Leptodactylus fuscus F</i>        | USNM303154         | AY911280           | O | Brazil        | São Paulo, Luiz Antonio                                                                              | Camargo et al., 2005       |                       |
| <i>Leptodactylus fuscus F</i>        | USNM303155         | AY911281           | O | Brazil        | São Paulo, Luiz Antonio                                                                              | Camargo et al., 2005       |                       |
| <i>Leptodactylus fuscus F</i>        | USNM303156         | AY911282           | O | Brazil        | São Paulo, Luiz Antonio                                                                              | Camargo et al., 2005       |                       |
| <i>Leptodactylus fuscus F</i>        | USNM303157         | AY911283           | X | Brazil        | São Paulo, Luiz Antonio                                                                              | Camargo et al., 2005       |                       |
| <i>Leptodactylus fuscus G</i>        | FML04788           | AY911271           | X | Argentina     | Salta, Joaquín V. González                                                                           | Camargo et al., 2005       | 24 48 33 S 65 21 47 W |
| <i>Leptodactylus fuscus H</i>        | CBF02908           | AY911275           | X | Bolivia       | Beni Biosphere Reserve                                                                               | Camargo et al., 2005       | 13 24 01 S 64 33 20 W |
| <i>Leptodactylus fuscus I</i>        | MZUSP66954         | AY911268           | X | Brazil        | Pará, Serra de Kukoinhoken, Kenpore                                                                  | Camargo et al., 2005       | 07 46 00 S 51 57 00 W |
| <i>Lithobates palmipes A</i>         | KU 202896          | AY779211           | X | Ecuador       | Napo, Misahualli, 600 m                                                                              | Hillis and Wilcox, 2005    | 01 02 00 S 77 40 13 W |
| <i>Lithobates palmipes A</i>         | 10mc               | AF467266; AF467265 | X | French Guiana | Trois saut                                                                                           | Salducci et al., 2004      | 02 14 00 N 52 52 00 W |
| <i>Lithobates palmipes A</i>         | AMNH A166454       | DQ283384           | X | Guyana        | Magdalen's Creek camp, 300 yds NW bank of Konawaruk River ca. 25 mi (linear) WSW Mabura Hill, 400 ft | Frost et al., 2006         | 05 13 70 N 59 02 43 W |
| <i>Lithobates palmipes B</i>         | AMNH A-118801      | AY779210           | X | Venezuela     | Amazonas, Neblina Base Camp on Rfo Mawarinuma                                                        | Hillis and Wilcox, 2005    | 00 49 50 N 66 09 40 W |

|                                     |                           |          |   |               |                                                                                                        |                            |                       |
|-------------------------------------|---------------------------|----------|---|---------------|--------------------------------------------------------------------------------------------------------|----------------------------|-----------------------|
| <i>Lithodytes lineatus A</i>        | 55mc                      | EU201136 | X | French Guiana | Grand,Santi                                                                                            | New                        | 04 20 00 N 54 15 00 W |
| <i>Lithodytes lineatus A</i>        | AMNH-A 166426             | AY843690 | X | Guyana        | Berbice River camp at ca 18 mi (linear) SW Kwakwani (ca. 2 mi downriver from Kurundi River confluence) | Faivovich et al., 2005     | 05 05 06 N 58 14 14 W |
| <i>Lithodytes lineatus B</i>        | N. Basso; USP 968438      | AY326012 | X | Brazil        | Mato grosso, Apiacas                                                                                   | Darst and Cannatella, 2003 | 09 39 09 S 57 23 36 W |
| <i>Lithodytes lineatus B</i>        | MZUSP 80874               | AY943241 | O | Brazil        | Mato grosso, Apiacas                                                                                   | de Sà et al., 2005         | 09 39 09 S 57 23 36 W |
| <i>Lithodytes lineatus C</i>        | LM 269                    | U39988   | O | Peru          | ?                                                                                                      | Ruvinski and maxson, 1996  |                       |
| <i>Osteocephalus cabrerai</i>       | JPC 13178; LSUMZ H-13720  | AY843705 | X | Brazil        | Acre, Porto Walter                                                                                     | Faivovich et al., 2005     | 08 15 31 S 72 46 37 W |
| <i>Osteocephalus cabrerai</i>       | 14mc                      | AF467267 | X | French Guiana | Kaw                                                                                                    | Salducci et al., 2004      | 04 42 00 N 52 18 00 W |
| <i>Osteocephalus lepieurii A</i>    | 141mc                     | EF376066 | X | French Guiana | Crique margot                                                                                          | Salducci et al., 2005      | 05 28 00 N 53 57 00 W |
| <i>Osteocephalus lepieurii B</i>    | AMNH-A 1312546            | AY549361 | X | Venezuela     | Amazonas, Neblina Base Camp on Rio Mawarinuma (=Rio Baria), 140 M                                      | Faivovich et al., 2004     | 00 49 50 N 66 09 40 W |
| <i>Osteocephalus lepieurii B</i>    | AMNH A-131254             | AY843707 | O | Venezuela     | Amazonas, Neblina Base Camp on Rio Mawarinuma (=Rio Baria), 140 M                                      | Faivovich et al., 2005     | 00 49 50 N 66 09 40 W |
| <i>Osteocephalus taurinus A</i>     | 214mc                     | EF376067 | X | French Guiana | Saül                                                                                                   | Salducci et al., 2005      | 03 37 32 N 53 12 26 W |
| <i>Osteocephalus taurinus B</i>     | AMNH-A 131245             | AY843709 | X | Venezuela     | Amazonas, Neblina Base Camp on Rio Mawarinuma (=Rio Baria), 140 M                                      | Faivovich et al., 2005     | 00 49 50 N 66 09 40 W |
| <i>Osteocephalus taurinus C</i>     | WED 55452; KU 205406      | AY326041 | X | Peru          | Madre de Dios, Cusco Amazonico                                                                         | Darst and Cannatella, 2003 | 11 39 00 S 70 33 35 W |
| <i>Phyllomedusa hypochondrialis</i> | 49mc                      | EF376079 | X | French Guiana | Grand,Santi                                                                                            | Salducci et al., 2005      | 04 20 00 N 54 15 00 W |
| <i>Phyllomedusa hypochondrialis</i> | MNH-A 141109; AMCC 101463 | AY843724 | X | Guyana        | Dubulay Ranch on the Berbice River, 200ft                                                              | Faivovich et al., 2005     | 05 40 55 N 57 51 32 W |
| <i>Phyllomedusa hypochondrialis</i> | 109AF                     | EU201085 | X | Suriname      | Brownsberg                                                                                             | New                        | 04 56 31 N 55 10 33 W |
| <i>Phyllomedusa tomopterna A</i>    | 53mc                      | EF376077 | X | French Guiana | Kaw                                                                                                    | Salducci et al., 2005      | 04 42 00 N 52 18 00 W |
| <i>Phyllomedusa tomopterna B</i>    | 181AF                     | EU201086 | X | Suriname      | Brownsberg                                                                                             | New                        | 04 56 31 N 55 10 33 W |
| <i>Phyllomedusa tomopterna C</i>    | WED 55380; KU 205428      | AY326045 | X | Peru          | Madre de Dios, Cusco Amazonico                                                                         | Darst and Cannatella, 2003 | 11 39 00 S 70 33 35 W |
| <i>Phyllomedusa tomopterna D</i>    | MJH 7076                  | AY843728 | X | Peru          | Huanuco, Rio Llullapichis, Panguana                                                                    | Faivovich et al., 2005     | 09 23 02 S 75 52 57 W |
| <i>Phyllomedusa vaillanti</i>       | 84bm                      | EU201087 | X | French Guiana | Petit,saut                                                                                             | New                        | 05 04 00 N 53 03 00 W |
| <i>Phyllomedusa vaillanti</i>       | AMNH-A 1662888            | AY549363 | X | Guyana        | Berbice River camp at ca.18 mi (linear)SW Kwakwan                                                      | Faivovich et al., 2004     | 05 05 06 N 58 14 14 W |
| <i>Pipa pipa A</i>                  | 11mc                      | EU201058 | X | French Guiana | Guatemala                                                                                              | New                        | 05 09 00 N 52 38 00 W |
| <i>Pipa pipa B</i>                  | KU 205801                 | AY581621 | X | Peru          | Madre de Dios, Cusco Amazonico 15 km E of Puerto Maldonado                                             | Evans et al., 2004         | 12 34 48 S 69 03 51 W |
| <i>Pipa pipa C</i>                  | USNM 546385               | DQ283053 | X | Venezuela     | Amazonas, Depto. Rio Negro, Neblina Base Camp on the Rio Baria, 140 m                                  | Frost et al., 2006         | 00 49 50 N 66 09 40 W |
| <i>Ranitomeya amazonica</i>         | DamaAema                  | AF482785 |   | Peru          | Almendras, Loreto, Peru                                                                                | Symula et al., 2003        | 03 48 00 S 73 25 00 W |
| <i>Ranitomeya variabilis</i>        | DvTY26b                   | AF412492 |   | Peru          | 26 km NE Tarapoto, San Martin,                                                                         | Summers et al., 2001       | 06 21 37 S 76 24 45 W |
| <i>Ranitomeya ventrimaculata</i>    | MNHN2000-0659             | AY263248 | O | French Guiana | Nouragues                                                                                              | Vences et al., 2003        | 04 05 00 N 52 41 00 W |
| <i>Ranitomeya ventrimaculata A</i>  | 105mc                     | EU201084 | X | French Guiana | Tibourou                                                                                               | New                        | 04 25 00 N 52 18 00 W |
| <i>Ranitomeya ventrimaculata B</i>  | 75bm                      | EU201083 | X | French Guiana | Pic coudreau                                                                                           | New                        | 03 18 02 N 52 56 77 W |
| <i>Ranitomeya ventrimaculata B</i>  | BPN737                    | DQ163076 | O | French Guiana | Kaw                                                                                                    | Noonan and Wray, 2006      | 04 42 00 N 52 18 00 W |
| <i>Ranitomeya ventrimaculata B</i>  | BPN741                    | DQ163077 | O | French Guiana | Maripa                                                                                                 | Noonan and Wray, 2006      | 03 48 52 N 51 53 06 W |
| <i>Ranitomeya ventrimaculata B</i>  | BPN742                    | DQ163078 | O | French Guiana | Maripa                                                                                                 | Noonan and Wray, 2006      | 03 48 52 N 51 53 06 W |
| <i>Ranitomeya ventrimaculata B</i>  | BPN744                    | DQ163080 | O | French Guiana | Maripa                                                                                                 | Noonan and Wray, 2006      | 03 48 52 N 51 53 06 W |
| <i>Ranitomeya ventrimaculata B</i>  | BPN664                    | DQ163075 | O | French Guiana | Pic Matecho                                                                                            | Noonan and Wray, 2006      | 03 45 00 N 53 02 00 W |
| <i>Ranitomeya ventrimaculata B</i>  | BPN762                    | DQ163081 | O | French Guiana | Saül                                                                                                   | Noonan and Wray, 2006      | 03 37 32 N 53 12 26 W |
| <i>Ranitomeya ventrimaculata C</i>  | JDL 24489                 | DQ502266 | X | Colombia      | Amazonas,Leticia,Km11(Leticia,Tarapaca)                                                                | Grant et al., 2006         | 04 10 06 S 69 54 41 W |
| <i>Ranitomeya ventrimaculata D</i>  | OMNH 37440                | DQ502232 | O | Brazil        | Amazonas, Castanho, ca. 40 km S Manaus,at km 12 on road to Autazes                                     | Grant et al., 2006         | 03 37 10 S 59 86 78 W |
| <i>Ranitomeya ventrimaculata D</i>  | DvenBraz1                 | AF482797 | X | Brazil        | Porto Walter, Acre, Brazil                                                                             | Symula et al., 2003        | 08 15 31 S 72 46 37 W |
| <i>Ranitomeya ventrimaculata E</i>  | OMNH 36666                | DQ502071 | X | Brazil        | Amazonas, Rio Ituxi, Scheffer Madeireira                                                               | Grant et al., 2006         | 08 28 45 S 65 42 59 W |
| <i>Ranitomeya ventrimaculata E</i>  | OMNH 36667                | DQ502072 | O | Brazil        | Amazonas, Rio Ituxi, Scheffer Madeireira                                                               | Grant et al., 2006         | 08 28 45 S 65 42 59 W |
| <i>Ranitomeya ventrimaculata E</i>  | LSUMZ H-3092              | DQ163079 | O | Brazil        | Rio Ituxi, Amazonas                                                                                    | Noonan and Wray, 2006      | 08 28 45 S 65 42 59 W |
| <i>Ranitomeya ventrimaculata F</i>  | ?                         | AF128619 | O | Ecuador       | Pompeya                                                                                                | Clough and Summers, 2000   | 00 00 03 N 76 36 28 W |
| <i>Ranitomeya ventrimaculata F</i>  | OMNH 34091                | DQ502069 | O | Ecuador       | Sucumbios, Estacion Cientifica de Universidad Catolica near Reserva Faunistica Cuyabeno, 220m          | Grant et al., 2006         | 00 00 00 S 76 10 00 W |
| <i>Ranitomeya ventrimaculata F</i>  | QCAZ16566                 | AY364570 | O | Ecuador       | ?                                                                                                      | Santos et al., 2003        |                       |
| <i>Ranitomeya ventrimaculata F</i>  | DvenEcuador               | AF482795 | X | Ecuador       | Pompeya, Sucumbios                                                                                     | Symula et al., 2003        | 00 00 03 N 76 36 28 W |
| <i>Ranitomeya ventrimaculata G</i>  | DvnNBon2                  | AF412494 | X | Peru          | Bonilla, San Martin, Peru                                                                              | Symula et al., 2003        | 06 12 36 S 76 16 20 W |



|                                               |                 |          |   |               |                                                                                 |                          |                       |
|-----------------------------------------------|-----------------|----------|---|---------------|---------------------------------------------------------------------------------|--------------------------|-----------------------|
| <i>Ranitomeya ventrimaculata H</i>            | DvenNAPO        | AF482796 | X | Peru          | N. Bank Napo R., Loreto                                                         | Symula et al., 2003      |                       |
| <i>Ranitomeya ventrimaculata I</i>            | Dvenorama       | AF482791 | X | Peru          | Allpahuayo, Loreto, Peru                                                        | Symula et al., 2003      | 03 52 52 S 73 26 02 W |
| <i>Ranitomeya ventrimaculata J</i>            | OMNH 36062      | DQ502233 | O | Brazil        | Acre, Porto Walter                                                              | Grant et al., 2006       | 08 15 31 S 72 46 37 W |
| <i>Ranitomeya ventrimaculata J</i>            | MPEG 12394      | DQ502070 | X | Brazil        | Acre, Porto Walter                                                              | Grant et al., 2006       | 08 15 31 S 72 46 37 W |
| <i>Ranitomeya ventrimaculata K</i>            | DvnNBon1        | AF412493 | O | Peru          | Bonilla, San Martin, Peru                                                       | Symula et al., 2003      | 07 02 46 S 76 47 00 W |
| <i>Ranitomeya ventrimaculata L</i>            | DvenITYB8a2     | AF482799 | O | Peru          | Nauta Road Iquitos, Loreto                                                      | Symula et al., 2003      | 04 34 14 S 73 46 00 W |
| <i>Rhaebo guttatus A</i>                      | 144mc           | EF364307 | X | French Guiana | Crique margot                                                                   | Fouquet et al., 2007     | 05 28 00 N 53 57 00 W |
| <i>Rhaebo guttatus A</i>                      | AMNH A141058    | DQ283375 | X | Guyana        | Dubulay Ranch on the Berbice River, 200ft                                       | Frost et al., 2006       | 05 40 55 N 57 51 32 W |
| <i>Rhaebo guttatus B</i>                      | LSUMZ 17418     | DQ158459 | X | Brazil        | Rondonia                                                                        | Pramuk, 2006             |                       |
| <i>Rhinella castaneotica</i>                  | LSUMZ 17429     | DQ158440 |   | Brazil        | Para, 100 km S Santarem                                                         | Pramuk, 2006             | 03 09 00 S 54 50 00 W |
| <i>Rhinella cf.margaritifera F</i>            | QCAZ 13896      | DQ158471 | X | Ecuador       | Cañar, Manta Real                                                               | Pramuk, 2006             | 02 30 44 S 79 04 56 W |
| <i>Rhinella cf.margaritifera F</i>            | QCAZ 11597      | DQ158472 | O | Ecuador       | Provincia Esmeraldas, Bosque Protector, 30 km from San Lorenzo by way of Ibarra | Pramuk, 2006             | 01 16 47 N 78 42 29 W |
| <i>Rhinella cf.margaritifera G</i>            | QCAZ 10601      | DQ158470 | X | Ecuador       | Francisco de Orellana, Parque Nacional Yasuní, Napo                             | Pramuk, 2006             | 00 26 56 S 77 00 55 W |
| <i>Rhinella cf.margaritifera I</i>            | USNM 268828     | DQ158490 | X | Peru          | Madre de Dios                                                                   | Pramuk, 2006             | 11 39 00 S 70 33 35 W |
| <i>Rhinella cf.margaritifera J</i>            | KU 215145       | DQ158491 | X | Peru          | Madre de Dios                                                                   | Pramuk, 2006             | 11 39 00 S 70 33 35 W |
| <i>Rhinella dapsilis</i>                      | QCAZ 3509       | DQ158448 |   | Ecuador       | Pichincha, Bosque Protector La Perla, 5 km E La Concordia                       | Pramuk, 2006             | 00 00 01 S 79 22 59 W |
| <i>Rhinella margaritifera A</i>               | 204mc           | EF364295 | X | French Guiana | Saül                                                                            | Fouquet et al., 2007     | 03 37 32 N 53 12 26 W |
| <i>Rhinella margaritifera A 24 additional</i> |                 |          | O | French Guiana |                                                                                 | Fouquet et al., 2007     |                       |
| <i>Rhinella margaritifera B</i>               | 143PG           | EF364302 | O | French Guiana | Kaw                                                                             | Fouquet et al., 2007     | 04 42 00 N 52 18 00 W |
| <i>Rhinella margaritifera B</i>               | 144PG           | EF364302 | X | French Guiana | Kaw                                                                             | Fouquet et al., 2009     | 04 42 00 N 52 18 00 W |
| <i>Rhinella margaritifera C</i>               | 157mc           | EF364303 | O | French Guiana | Tri jonction                                                                    | Fouquet et al., 2007     | 02 20 00 N 54 36 00 W |
| <i>Rhinella margaritifera C</i>               | 156mc           | EF364303 | X | French Guiana | Tri jonction                                                                    | Fouquet et al., 2011     | 02 20 00 N 54 36 00 W |
| <i>Rhinella margaritifera D</i>               | 5mc             | EF364304 | X | French Guiana | Cisame                                                                          | Fouquet et al., 2007     | 04 11 00 N 52 22 00 W |
| <i>Rhinella margaritifera D 4 additional</i>  |                 |          | O | French Guiana |                                                                                 | Fouquet et al., 2007     |                       |
| <i>Rhinella margaritifera E</i>               | 131bm           | EF364287 | X | French Guiana | Mataroni                                                                        | Fouquet et al., 2015     | 04 12 00 N 52 10 00 W |
| <i>Rhinella margaritifera E 17 additional</i> |                 |          | O | French Guiana |                                                                                 | Fouquet et al., 2007     |                       |
| <i>Rhinella margaritifera G</i>               | AGG172 (QCAZ)   | AF375514 | O | Ecuador       | Volcan Sumaco, Provincia Napo                                                   | Gluesenkamp, unpublished | 00 27 51 S 77 35 30 W |
| <i>Rhinella margaritifera H</i>               | ZUEC (DCC 3393) | AY680262 | X | Brazil        | Rio de Janeiro, Mage', Campo de Escouteiras, Santo Aleixo                       | Pauly et al., 2004       | 22 33 54 S 43 04 09 W |
| <i>Scinax boesemani A</i>                     | 147mc           | EF217501 | X | French Guiana | Guatemala                                                                       | Fouquet et al., 2007     | 05 09 00 N 52 38 00 W |
| <i>Scinax boesemani A 7 additional</i>        |                 |          | O | French Guiana |                                                                                 | Fouquet et al., 2007     |                       |
| <i>Scinax boesemani B</i>                     | 932BPN          | EU201090 | X | Suriname      | Road to Apura                                                                   | New                      | 05 11 00 N 55 37 00 W |
| <i>Scinax boesemani C</i>                     | 1022BPN         | EU201089 | X | Suriname      | Sipilawini                                                                      | New                      | 02 02 00 N 56 07 00 W |
| <i>Scinax boesemani D</i>                     | 198mc           | EF217503 | X | French Guiana | Grand Santi                                                                     | Fouquet et al., 2007     | 04 20 00 N 54 15 00 W |
| <i>Scinax boesemani D</i>                     | 39mc            | EF376072 | O | French Guiana | Grand Santi                                                                     | Salducci et al., 2005    | 04 20 00 N 54 15 00 W |
| <i>Scinax boesemani E</i>                     | 1169BPN         | EU201088 | X | Guyana        | Mazaruni, Potaro Imbaimadai                                                     | New                      | 05 44 23 N 60 17 51 W |
| <i>Scinax cf. cruentommus A</i>               | 8mc             | AF467263 | X | French Guiana | Kaw                                                                             | Salducci et al., 2004    | 04 42 00 N 52 18 00 W |
| <i>Scinax cf. cruentommus A 20 additional</i> |                 |          | O | French Guiana |                                                                                 | Fouquet et al., 2007     |                       |
| <i>Scinax cf. cruentommus B</i>               | 324mc           | EU201093 | X | French Guiana | Antecum, Pata                                                                   | New                      | 03 19 00 N 54 04 00 W |
| <i>Scinax fuscovarius</i>                     | MACN 38647      | AY843758 | X | Argentina     | Misiones, Guarani, San Vicente, Campo Anexo INTA 'Cuartel Rio Victoria          | Faivovich et al., 2005   | 26 56 00 S 54 24 00 W |
| <i>Scinax nasicus</i>                         | MACN 38650      | AY843759 | X | Argentina     | Buenos Aires, Baradero, Estancia 'El Retonio'                                   | Faivovich et al., 2005   | 33 48 44 S 59 30 25 W |
| <i>Scinax nebulosus B</i>                     | 394BPN          | EU201094 | X | Brazil        | State of Pernambuco, Timbaúba, Engenho Água Azul                                | New                      | 06 38 05 S 37 54 02 W |
| <i>Scinax nebulosus A</i>                     | 24mc            | AF467262 | X | French Guiana | Régina, St Georges Road                                                         | Salducci et al., 2004    | 04 03 00 N 52 01 00 W |
| <i>Scinax nebulosus A 2 additional</i>        |                 |          | O | French Guiana |                                                                                 | Fouquet et al., 2007     |                       |
| <i>Scinax nebulosus D</i>                     | AA900           | EU201095 | X | Guyana        | Barima, Waini Mabaruma                                                          | New                      | 08 12 00 N 59 46 48 W |
| <i>Scinax nebulosus C</i>                     | CE581           | EU201096 | X | Brazil        | Ceará State, Ibiapina, Sítio Pimentas, Vivenda Santa Rosa                       | New                      | 03 55 00 S 40 53 00 W |
| <i>Scinax ruber A</i>                         | 74mc            | EF217478 | X | French Guiana | Montagne d'argent                                                               | Fouquet et al., 2007     | 04 23 00 N 51 42 00 W |
| <i>Scinax ruber A 15 additional</i>           |                 |          | O | French Guiana |                                                                                 | Fouquet et al., 2007     |                       |

|                                     |                            |          |   |               |                                                      |                            |                       |
|-------------------------------------|----------------------------|----------|---|---------------|------------------------------------------------------|----------------------------|-----------------------|
| <i>Scinax ruber B</i>               | 151mc                      | EF217481 | X | French Guiana | Guatemala                                            | Fouquet et al., 2007       | 05 09 00 N 52 38 00 W |
| <i>Scinax ruber B 10 additional</i> |                            |          | O | French Guiana |                                                      | Fouquet et al., 2007       |                       |
| <i>Scinax ruber C</i>               | WED 56265; KU 207622       | AY326034 | X | Peru          | Madre de Dios, Cusco Amazonico                       | Darst and cannatella, 2003 | 11 39 00 S 70 33 35 W |
| <i>Scinax ruber D</i>               | 40mc                       | EF376073 | O | French Guiana |                                                      | Fouquet et al., 2007       |                       |
| <i>Scinax ruber D</i>               | 178mc                      | EF376073 | X | French Guiana | Ouanary                                              | Salducci et al., 2005      | 04 15 00 N 51 40 00 W |
| <i>Scinax ruber D</i>               | 164AF                      | EU201092 | X | Suriname      | Brownsberg                                           | New                        | 04 56 31 N 55 10 33 W |
| <i>Scinax ruber D 3 additional</i>  |                            |          | O | French Guiana |                                                      | Fouquet et al., 2007       |                       |
| <i>Scinax ruber E</i>               | IWK 109                    | AY549365 | X | Guyana        | Iwokrama, Muri Scrub camp                            | Faivovich et al., 2004     | 04 40 17 N 58 41 06 W |
| <i>Scinax ruber F</i>               | 76mc                       | EF217490 | X | French Guiana | Mont Ravel                                           | Fouquet et al., 2007       | 04 54 42 N 52 15 39 W |
| <i>Scinax ruber F 9 additional</i>  |                            |          | O | French Guiana |                                                      | Fouquet et al., 2007       |                       |
| <i>Scinax ruber G</i>               | 360mc                      | EU201091 | X | French Guiana | Mont Ravel                                           | New                        | 04 54 42 N 52 15 39 W |
| <i>Scinax ruber H</i>               | QCAZ25275                  | EF217487 | X | Ecuador       | AUCA14road,parroquia Dayuma,canton coca,Orellana     | Fouquet et al., 2007       | 01 04 03 S 77 36 55 W |
| <i>Scinax ruber H 3 additional</i>  |                            |          | O | Ecuador       |                                                      | Fouquet et al., 2007       |                       |
| <i>Scinax x-signatus</i>            | 144bm                      | EF217479 | X | French Guiana | Kaw                                                  | Fouquet et al., 2007       | 04 42 00 N 52 18 00 W |
| <i>Sphaenorhynchus lacteus</i>      | 85mc                       | EF217515 | X | French Guiana | Kaw                                                  | Fouquet et al., 2007       | 04 42 00 N 52 18 00 W |
| <i>Sphaenorhynchus lacteus</i>      | USNM 268930                | AY549367 | X | Peru          | Madre de Dios, Tambopata Reserve                     | Faivovich et al., 2004     | 14 13 25 S 69 10 36 W |
| <i>Trachycephalus hadroceps</i>     | MNHN 2001.0814             | AY843717 |   | French Guiana | Kaw                                                  | Faivovich et al., 2005     | 04 42 00 N 52 18 00 W |
| <i>Trachycephalus resinifictrix</i> | AMNH-A 131201; AMCC 101463 | AY843719 |   | Venezuela     | Amazonas, Neblina Base Camp on Rio Mawarinuma, 140 m | Faivovich et al., 2005     | 00 49 50 N 66 09 40 W |
| <i>Trachycephalus venulosus A</i>   | 163mc                      | EF376069 | X | French Guiana | Guatemala                                            | Salducci et al., 2005      | 05 09 00 N 52 38 00 W |
| <i>Trachycephalus venulosus A</i>   | AMNH-A 1411427             | AY549362 | X | Guyana        | Dubulay Ranch on the Berbice River, 200ft            | Faivovich et al., 2004     | 05 40 55 N 57 51 32 W |
| <i>Trachycephalus venulosus B</i>   | DCC 3069; TNHC 62490       | AY326048 | X | Ecuador       | ?                                                    | Darst and cannatella, 2003 |                       |
| <i>Trachycephalus venulosus C</i>   | ?                          | AY364350 | O | ?             | ?                                                    | Biju and Bossuyt, 2003     |                       |
| <i>Trachycephalus venulosus C</i>   | VUB 0987                   | AY364371 | X | ?             | ?                                                    | Biju and Bossuyt, 2003     |                       |
